# Supplementary material for: External electric field driven electronic structures: tunable nonlinear optical properties of helical bilayer nanographenes
Source: Royal Society of Chemistry journal article supplement (doi:10.1039/d3nj04880b), 2024-01-01
Supplement: d3nj04880b1.pdf [file d3nj04880b1.pdf]

## Supporting Information

# External Electric field Driven Electronic Structures: Tunable Nonlinear Optical Properties in Helical Bilayer Nanographenes

Ping-yao Gan,<sup>a</sup> Xiao Huang,<sup>a</sup> Feng-wei Gao,<sup>\*ab</sup> Hong-liang Xu<sup>\*c</sup>

<sup>a</sup> School of Chemistry and Environmental Engineering, Changchun University of Science and Technology, 7989 Weixing Road, Changchun 130012, China.

<sup>b</sup> Chongqing Research Institute, Changchun University of Science and Technology, No.618 Liangjiang Avenue, Longxing Town, Yubei District, Chongqing City 401135, China.

E-mail: gaofw@cust.edu.cn

<sup>c</sup> Institute of Functional Material Chemistry, Department of Chemistry, Northeast Normal University, Changchun 130024, China.

E-mail: hlxu@nenu.edu.cn

### Table of contents

|                                                                                                                                                                                                                                     |   |
|-------------------------------------------------------------------------------------------------------------------------------------------------------------------------------------------------------------------------------------|---|
| <b>Figure S1.</b> Evolutions of the non-covalent interaction (NCI) and reduced density gradient (RDG) maps of the [9]HBNG under the vertical $F_z$ ( $F_z = 1 \times 10^{-4}$ , au)                                                 | 2 |
| <b>Figure S2.</b> Evolutions of dipole moment ( $\mu$ ) of ground state under the vertical $F_z$ ( $F_z = 1 \times 10^{-4}$ , au)                                                                                                   | 3 |
| <b>Figure S3.</b> Evolutions of the first hyperpolarizabilities ( $\beta_{\text{tot}}$ ) of [9]HBNG under the vertical $F_z$ ( $F_z = 1 \times 10^{-4}$ , au) at the M06-2X/6-31G**, CAM-B3LYP/6-31G** and BHandHLYP/6-31G** levels | 4 |
| <b>Figure S4.</b> Evolutions of the electron density difference maps (EDDM) of the [9]HBNG under the vertical $F_z$ ( $F_z = 1 \times 10^{-4}$ , au)                                                                                | 5 |
| <b>Figure S5.</b> Evolutions of the 2D second-order NLO spectra the [9]HBNG under the $F_z$ ( $F_z = 1 \times 10^{-4}$ , au)                                                                                                        | 6 |
| <b>Figure S6.</b> Evolutions of the electron circular dichroism (ECD) spectrum of the [9]HBNG under the $F_z$ ( $F_z = 1 \times 10^{-4}$ , au)                                                                                      | 7 |
| <b>Table S1.</b> Evolutions of the $\beta_x$ , $\beta_y$ , $\beta_z$ and $\beta_{\text{tot}}$ values of [9]HBNG under the vertical $F_z$ ( $F_z = 1 \times 10^{-4}$ , au)                                                           | 8 |

# Supporting Information

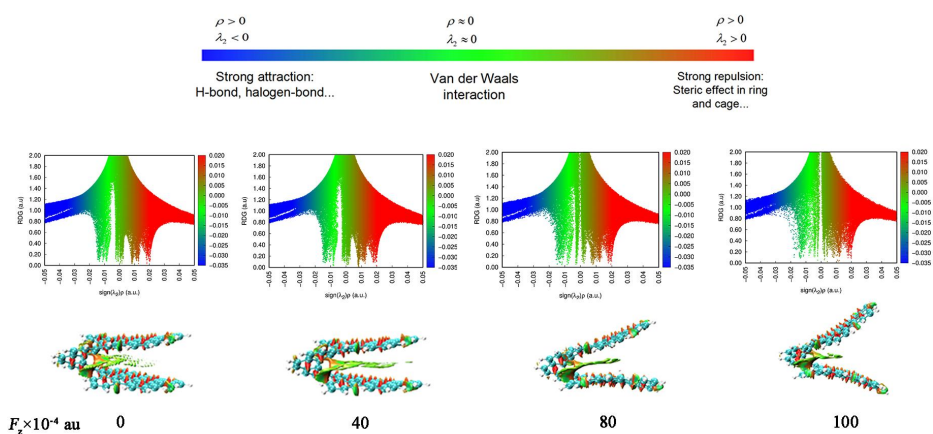

Figure S1. Evolutions of the non-covalent interaction (NCI) and reduced density gradient (RDG) maps of the [9]HBNG under the vertical  $F_z$  ( $F_z = 1 \times 10^{-4}$ , au).

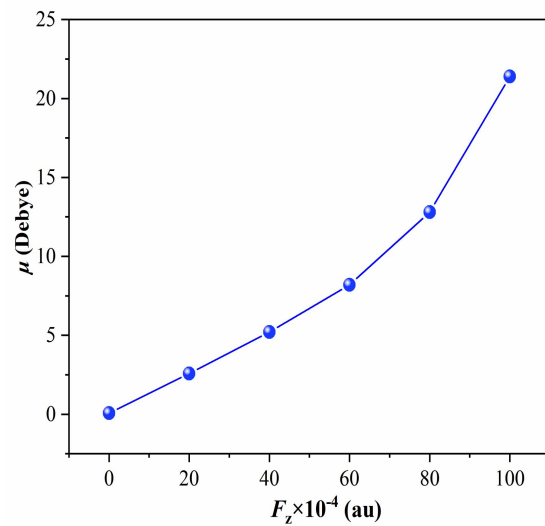

Figure S2. Evolutions of dipole moment ( $\mu$ ) of ground state under the vertical  $F_z$  ( $F_z = 1 \times 10^{-4}$ , au).

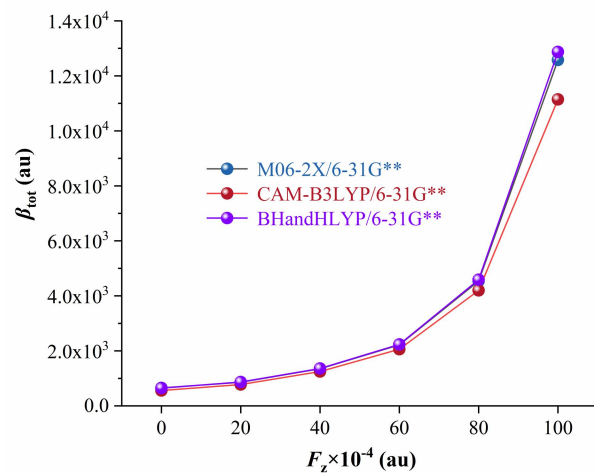

Figure S3. Evolutions of the first hyperpolarizabilities ( $\beta_{\text{tot}}$ ) of [9]HBNG under the vertical  $F_z$  ( $F_z = 1 \times 10^{-4}$ , au) at the M06-2X/6-31G\*\*, CAM-B3LYP/6-31G\*\* and BHandHLYP/6-31G\*\* levels.

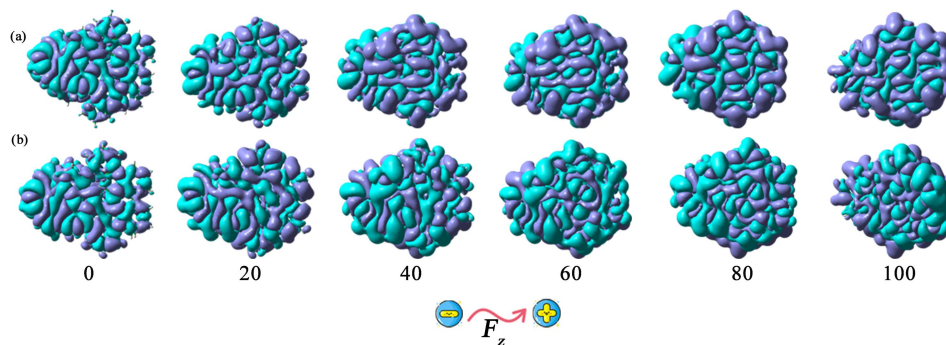

Figure S4. Evolutions of the electron density difference maps (EDDM) of the [9]HBNG under the vertical  $F_z$  ( $F_z = 1 \times 10^{-4}$ , au).

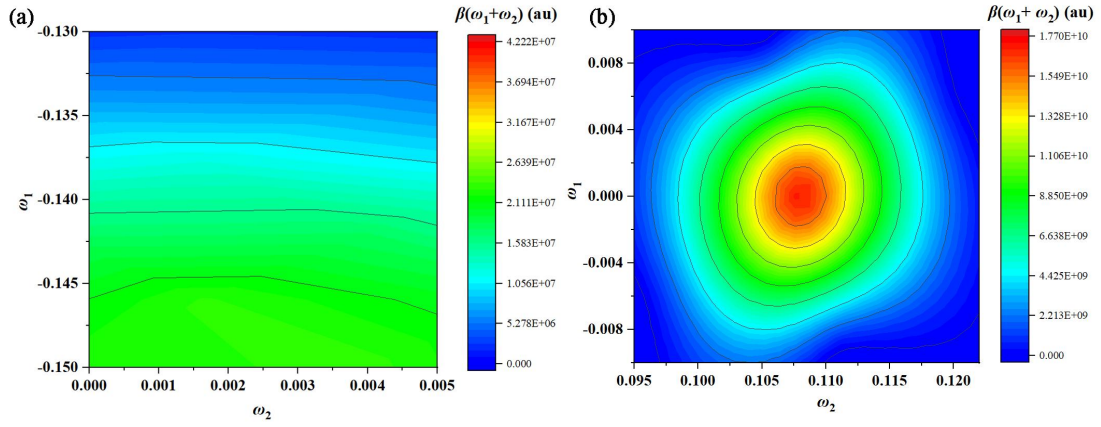

Figure S5. Evolutions of the 2D second-order NLO spectra the [9]HBNG ((a)  $F_z = 0$  au, (b)  $F_z = 100 \times 10^{-4}$  au).

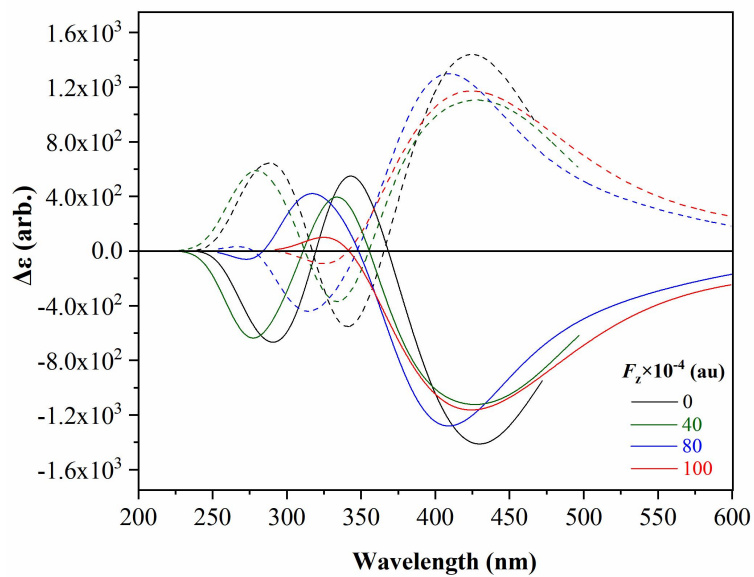

Figure S6. Evolutions of the electron circular dichroism (ECD) spectrum of the [9]HBNG under the  $F_z$  ( $F_z = 1 \times 10^{-4}$ , au).

## Supporting Information

---

Table S1. Evolutions of the  $\beta_x$ ,  $\beta_y$ ,  $\beta_z$  and  $\beta_{\text{tot}}$  values of [9]HBNG under the vertical  $F_z$  ( $F_z = 1 \times 10^{-4}$ , au).

| $F_z = 1 \times 10^{-4}$ (au) | $\beta_x$ | $\beta_y$ | $\beta_z$ | $\beta_{\text{tot}}$ |
|-------------------------------|-----------|-----------|-----------|----------------------|
| 0                             | 653       | 0         | 0         | 653                  |
| 20                            | 654       | 143       | 538       | 859                  |
| 40                            | 670       | 337       | 1121      | 1349                 |
| 60                            | 689       | 584       | 2028      | 2219                 |
| 80                            | 707       | 1011      | 4369      | 4540                 |
| 100                           | 1023      | 1603      | 12434     | 12579                |
